# Supplementary material
Source: Research Square preprint supplement (doi:10.21203/rs.3.rs-8907958/v1)
Supplement: Supplementary file 1 [file 07994ff16ac4ad073ad4725d.docx]

**Table 1.** Statistical analysis results of VAF values.

| Repeated measures ANOVA | | | | | | | | |
| --- | --- | --- | --- | --- | --- | --- | --- | --- |
|  | Muscle synergy | Muscle | Post | Mean±SD | Wilks’ Lambda |  | -value |  |
| Fatigue | 1 | RF | Pre | 79.236±10.142 | 0.863 | 0.316 | 0.746 | 0.137 |
| Post-1 | 78.978±5.425 |
| Post-2 | 77.633±12.608 |
| BF | Pre | 67.143±19.261 | 0.439 | 2.557 | 0.193 | 0.561 |
| Post-1 | 75.334±17.722 |
| Post-2 | 68.026±14.699 |
| TA | Pre | 84.87±11.499 | 0.427 | 2.679 | 0.183 | 0.573 |
| Post-1 | 85.842±5.553 |
| Post-2 | 75.89±14.484 |
| MG | Pre | 86.443±8.65 | 0.714 | 0.8 | 0.51 | 0.286 |
| Post-1 | 81.758±18.357 |
| Post-2 | 83.67±10.722 |
| 2 | RF | Pre | 96.574±2.533 | 0.357 | 3.606 | 0.127 | 0.643 |
| Post-1 | 97.867±2.761 |
| Post-2 | 95.735±4.068 |
| BF | Pre | 96.865±2.213 | 0.518 | 1.864 | 0.268 | 0.482 |
| Post-1 | 94.701±5.576 |
| Post-2 | 94.365±5.265 |
| TA | Pre | 96.321±2.215 | 0.378 | 3.288 | 0.143 | 0.622 |
| Post-1 | 94.536±3.503 |
| Post-2 | 91.151±8.3 |
| MG | Pre | 90.631±6.026 | 0.738 | 0.708 | 0.545 | 0.262 |
| Post-1 | 93.144±4.782 |
| Post-2 | 90.272±7.948 |
| 3 | RF | Pre | 99.706±.374 | 0.644 | 1.107 | 0.414 | 0.356 |
| Post-1 | 99.673±.272 |
| Post-2 | 98.914±1.494 |
| BF | Pre | 99.295±.749 | 0.479 | 2.173 | 0.23 | 0.521 |
| Post-1 | 98.701±1.497 |
| Post-2 | 98.743±2.029 |
| TA | Pre | 98.011±.486 | 0.929 | 0.153 | 0.863 | 0.071 |
| Post-1 | 98.352±1.883 |
| Post-2 | 97.39±3.284 |
| MG | Pre | 98.731±1.724 | 0.65 | 1.078 | 0.422 | 0.35 |
| Post-1 | 99.423±.358 |
| Post-2 | 98.847±.967 |
| 4 | RF | Pre | 100 | 0.647 | 1.092 | 0.418 | 0.353 |
| Post-1 | 100 |
| Post-2 | 100 |
| BF | Pre | 100 | 0.728 | 0.748 | 0.53 | 0.272 |
| Post-1 | 100 |
| Post-2 | 100 |
| TA | Pre | 100 | 0.677 | 0.953 | 0.459 | 0.323 |
| Post-1 | 100 |
| Post-2 | 100 |
| MG | Pre | 100 | 0.661 | 1.025 | 0.437 | 0.339 |
| Post-1 | 100 |
| Post-2 | 100 |

**Table 2.** Statistical analysis results of activation levels of MSCs.

| Repeated measures ANOVA | | | | | | | | |
| --- | --- | --- | --- | --- | --- | --- | --- | --- |
|  | MSC | Muscle | Post | Mean±SD | Wilks’ Lambda |  | -value |  |
| Fatigue | First | RF | Pre | .819±.366 | .895 | .235 | .801 | .105 |
| Post-1 | .69±.482 |
| Post-2 | .598±.457 |
| BF | Pre | .337±.388 | .906 | .207 | .821 | .094 |
| Post-1 | .48±.332 |
| Post-2 | .477±.406 |
| TA | Pre | .691±.252 | .495 | 2.037 | .245 | .505 |
| Post-1 | .429±.224 |
| Post-2 | .712±.303 |
| MG | Pre | .73±.171 | .381 | 3.25 | .145 | .619 |
| Post-1 | .525±.295 |
| Post-2 | .683±.183 |
| Second | RF | Pre | .181±.334 | .92 | .174 | .847 | .08 |
| Post-1 | .302±.41 |
| Post-2 | .368±.468 |
| BF | Pre | .666±.323 | .886 | .258 | .785 | .114 |
| Post-1 | .447±.427 |
| Post-2 | .519±.413 |
| TA | Pre | .383±.302 | .854 | .341 | .73 | .146 |
| Post-1 | .509±.242 |
| Post-2 | .36±.315 |
| MG | Pre | .362±.191 | .437 | 2.575 | .191 | .563 |
| Post-1 | .532±.248 |
| Post-2 | .382±.118 |

**Table 3.** Statistical analysis results of frequencies of MSAs.

| Repeated measures ANOVA | | | | | | | | |
| --- | --- | --- | --- | --- | --- | --- | --- | --- |
|  | MSA | Mode | Post | Mean±SD | Wilks’ Lambda |  | -value |  |
| Fatigue | First | VL | Pre | 39.83±14.607 | .889 | .25 | .79 | .111 |
| Post-1 | 40.33±10.596 |
| Post-2 | 33.83±20.243 |
| L | Pre | 19.5±12.178 | .867 | .307 | .752 | .133 |
| Post-1 | 15.67±9.585 |
| Post-2 | 21.5±15.859 |
| H | Pre | 19.5±11.221 | .855 | .338 | .732 | .145 |
| Post-1 | 25.17±16.327 |
| Post-2 | 18.83±12.384 |
| VH | Pre | 21.17±12.287 | .191 | 8.449 | .037* | .809 |
| Post-1 | 18.83±6.113 |
| Post-2 | 25.83±9.02 |
| Second | VL | Pre | 35.67±15.488 | .879 | .275 | .773 | .121 |
| Post-1 | 35.67±13.808 |
| Post-2 | 38.33±11.894 |
| L | Pre | 25.83±8.4 | .601 | 1.326 | .361 | .399 |
| Post-1 | 25.33±14.638 |
| Post-2 | 17.67±10.727 |
| H | Pre | 15.83±6.853 | .56 | 1.569 | .314 | .44 |
| Post-1 | 22.83±17.871 |
| Post-2 | 19.17±9.745 |
| VH | Pre | 22.67±8.165 | .616 | 1.244 | .38 | .384 |
| Post-1 | 16.17±8.183 |
| Post-2 | 24.83±7.6 |

*: Significant level
